# Supplementary material for: Clinical evaluation of droplet digital PCR in the early identification of suspected sepsis patients in the emergency department: a prospective observational study
Source: Frontiers journal article supplement (doi:10.3389/fcimb.2024.1358801), 2024-06-04
Supplement: Image_2.pdf [file Image_2.pdf]

**Figure S2**

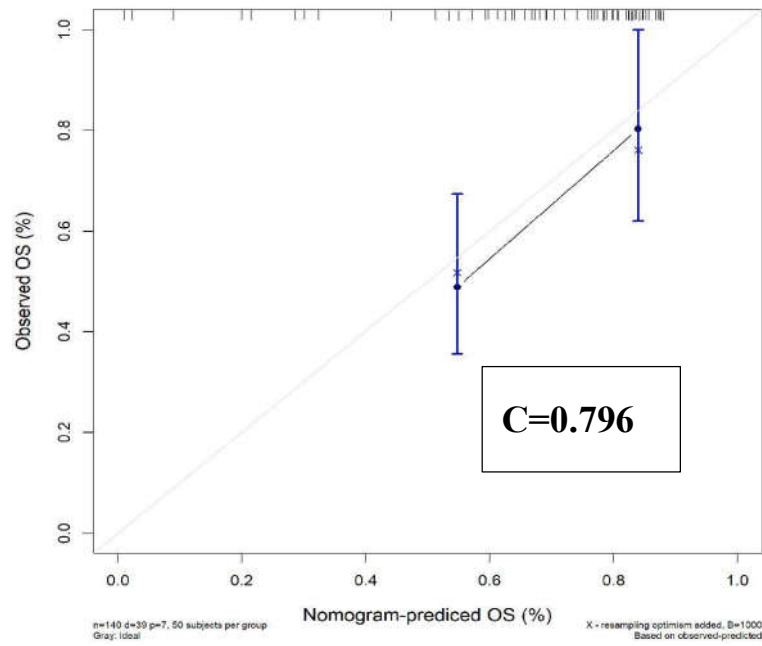

**Supplementary Figure 2** The calibration plot of the nomogram. A strong statistical consistency in predicting the 28-day mortality caused by BSI, as evidenced by a C value of 0.796. BSI bloodstream infection.
