# Supplementary material for: Clinical evaluation of droplet digital PCR in the early identification of suspected sepsis patients in the emergency department: a prospective observational study
Source: Frontiers journal article supplement (doi:10.3389/fcimb.2024.1358801), 2024-06-04
Supplement: Image_3.pdf [file Image_3.pdf]

**Figure S3**

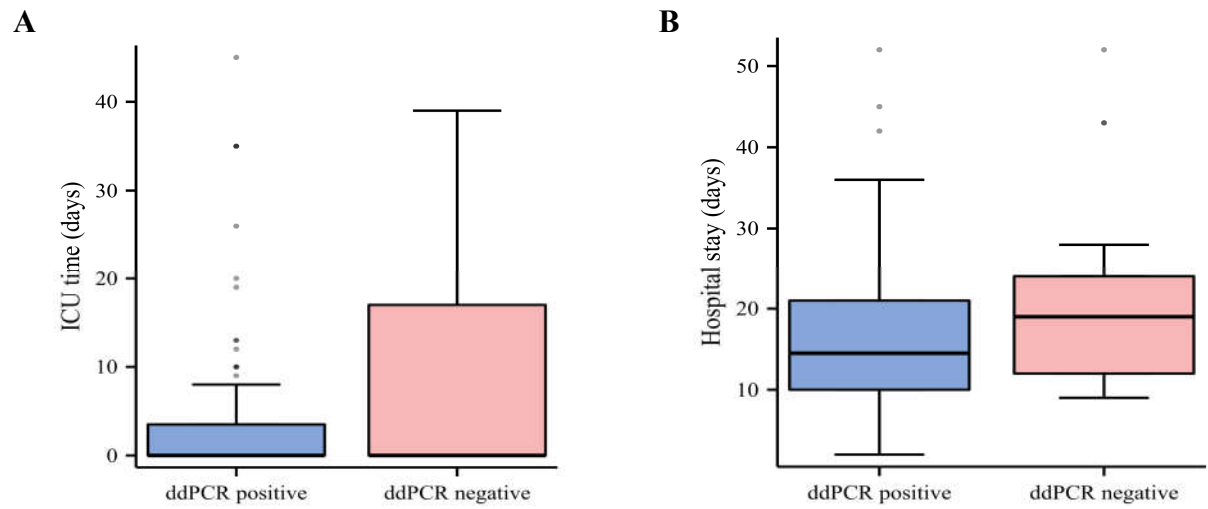

**Supplementary Figure 3** Comparison of the prognosis between negative and positive groups divided by ddPCR assay. **A** Comparison of the ICU time between ddPCR positive and ddPCR negative patients. **B** Comparison of the hospital stay between ddPCR positive and ddPCR negative patients.
